# Supplementary material for: Increased prevalence of ECG markers for sudden cardiac arrest in refractory epilepsy
Source: PubMed Central journal article supplement — J Neurol Neurosurg Psychiatry. 2014 Jun 19;86(3):309–13. doi: 10.1136/jnnp-2014-307772 (PMC4345521; doi:10.1136/jnnp-2014-307772), 2014-06-19
Supplement: jnnp-2014-307772-s1.pdf [file jnnp-2014-307772-s1.pdf]

## Supplemental Tables

Table e-1: Distribution of characteristics in people with or without severe QTc-prolongation (n=363)

|                               | Severe ↑QTc<br>(n=10) | No severe<br>↑QTc (n=353) | P-value          |
|-------------------------------|-----------------------|---------------------------|------------------|
| <b>Epilepsy:</b>              | 10 (100%)             | 175 (50%)                 | <b>0.002</b>     |
| <b>Demographics:</b>          |                       |                           |                  |
| Male gender                   | 1 (10%)               | 149 (42%)                 | <b>0.051</b>     |
| Age, years                    | 35.6 (12.5)           | 43.0 (13.8)               | <b>0.095</b>     |
| <b>Cardiac comorbidity:</b>   |                       |                           |                  |
| ≥2 cardiac risk factors       | 0 (0%)                | 18 (5%)                   | >0.999           |
| Myocardial infarction         | 0 (0%)                | 4 (1%)                    | >0.999           |
| Structural heart disease      | 0 (0%)                | 6 (2%)                    | >0.999           |
| <b>Cardiac risk factors:</b>  |                       |                           |                  |
| Hypertension                  | 0 (0%)                | 39 (11%)                  | 0.609            |
| Hypercholesterolemia          | 0 (0%)                | 34 (10%)                  | 0.608            |
| Diabetes Mellitus             | 0 (0%)                | 12 (3%)                   | >0.999           |
| <b>Medication use:</b>        |                       |                           |                  |
| QT-prolonging drugs           | 0 (0%)                | 40 (11%)                  | 0.610            |
| Depolarization-blocking drugs | 9 (90%)               | 137 (39%)                 | <b>0.002</b>     |
| Cardiovascular drugs          | 0 (0%)                | 58 (16%)                  | 0.375            |
| Lipid lowering drugs          | 0 (0%)                | 15 (4%)                   | >0.999           |
| <b>ECG parameters:</b>        |                       |                           |                  |
| Heart rate, beats per min     | 83.6 (5.8)            | 65.8 (11.2)               | <b>&lt;0.001</b> |
| PQ, msec                      | 162.8 (25.8)          | 159.5 (24.8)              | 0.676            |

|                            |              |              |                  |
|----------------------------|--------------|--------------|------------------|
| QRS, msec                  | 85.2 (7.9)   | 89.9 (12.3)  | 0.228            |
| QTc, msec                  | 481.0 (10.8) | 396.9 (26.7) | <b>&lt;0.001</b> |
| Brugada ECG pattern        | 0 (0%)       | 5 (1%)       | >0.999           |
| ERP (lateral and inferior) | 3 (30%)      | 82 (23%)     | 0.705            |
| ERP inferior               | 3 (30%)      | 67 (19%)     | 0.413            |

---

Dichotomous data are expressed as n (%), and continuous data as mean (SD) unless indicated otherwise. P-values are calculated with the  $\chi^2$ - or the Fisher's exact test in dichotomous data, and with the Student's t-test in continuous data. Cardiac risk factors include hypertension, hypercholesterolemia, and diabetes.

Table e-2: Distribution of characteristics in people with or without ERP (n=363)

|                               | ERP (n=85)   | No ERP (n=278) | P-value          |
|-------------------------------|--------------|----------------|------------------|
| <b>Epilepsy:</b>              | 62 (73%)     | 123 (44%)      | <b>&lt;0.001</b> |
| <b>Demographics:</b>          |              |                |                  |
| Male gender                   | 43 (51%)     | 107 (38%)      | <b>0.047</b>     |
| Age, years                    | 41.9 (14.2)  | 43.1 (13.7)    | 0.473            |
| <b>Cardiac comorbidity:</b>   |              |                |                  |
| ≥2 cardiac risk factors       | 3 (4%)       | 15 (6%)        | 0.775            |
| Myocardial infarction         | 3 (4%)       | 1 (1%)         | <b>0.041</b>     |
| Structural heart disease      | 4 (5%)       | 2 (1%)         | <b>0.029</b>     |
| <b>Medication use:</b>        |              |                |                  |
| QT-prolonging drugs           | 14 (16%)     | 26 (9%)        | <b>0.067</b>     |
| Depolarization-blocking drugs | 51 (60%)     | 95 (34%)       | <b>&lt;0.001</b> |
| Cardiovascular drugs          | 19 (22%)     | 39 (14%)       | <b>0.067</b>     |
| Lipid lowering drugs          | 4 (5%)       | 11 (4%)        | 0.758            |
| <b>ECG parameters:</b>        |              |                |                  |
| Heart rate, beats per min     | 69.2 (12.7)  | 65.4 (11.0)    | <b>0.015</b>     |
| PQ, msec                      | 160.6 (27.2) | 159.2 (24.1)   | 0.666            |
| QRS, msec                     | 89.5 (14.3)  | 89.9 (11.6)    | 0.817            |
| QTc, msec                     | 400.2 (33.3) | 399.0 (28.7)   | 0.743            |
| Brugada ECG pattern           | 0 (0%)       | 5 (2%)         | 0.595            |
| Pathological QTc-prolongation | 3 (4%)       | 7 (3%)         | 0.705            |

Dichotomous data are expressed as n (%), and continuous data as mean (SD) unless indicated otherwise. P-values are calculated with the  $\chi^2$ - or the Fisher's exact test in dichotomous data, and with the Student's t-test in continuous data. Cardiac risk factors include hypertension, hypercholesterolemia, and diabetes.

Table e-3: Distribution of characteristics in people with epilepsy with or without severe QTc-prolongation (n=185)

|                                  | Severe ↑QTc<br>(n=10) | No severe ↑QTc<br>(n=175) | P-value |
|----------------------------------|-----------------------|---------------------------|---------|
| <b>Epilepsy characteristics:</b> |                       |                           |         |
| Symptomatic epilepsy             | 3 (30%)               | 77 (44%)                  | 0.518   |
| History of epilepsy surgery      | 0 (0%)                | 14 (8%)                   | >0.999  |
| Age of onset, years              | 14.8 (8.4)            | 14.2 (10.9)               | 0.874   |
| Duration of epilepsy, years      | 20.8 (11.8)           | 23.9 (14.2)               | 0.499   |
| Seizure frequency (≥1/month)*    | 9 (100%)              | 155 (96%)                 | >0.999  |
| Polytherapy (≥2 AEDs)            | 8 (80%)               | 149 (85%)                 | 0.650   |
| Number of AEDs (median; range)   | 2 (1-4)               | 2 (1-6)                   | 0.168   |
| QT-prolonging drugs              | 0 (0%)                | 39 (5%)                   | 0.124   |
| Depolarization-blocking drugs    | 9 (90%)               | 136 (78%)                 | 0.693   |
| Learning disability              | 2 (20%)               | 28 (16%)                  | 0.666   |
| Family history of epilepsy       | 1 (10%)               | 21 (12%)                  | >0.999  |

Dichotomous data are expressed as n (%), and continuous data as mean (SD) unless indicated otherwise. P-values are calculated with the  $\chi^2$ - or the Fisher's exact test in dichotomous data, and with the Student's t- or Mann-Whitney U-test in continuous data. \*In 14 cases (8%) seizure frequency was unknown.

Table e-4: Distribution of characteristics in people with epilepsy with or without ERP (n=185)

|                                          | ERP (n=62)  | No ERP (n=123) | P-value |
|------------------------------------------|-------------|----------------|---------|
| <b>Epilepsy characteristics:</b>         |             |                |         |
| Symptomatic epilepsy                     | 28 (45%)    | 52 (42%)       | 0.709   |
| History of epilepsy surgery              | 5 (8%)      | 9 (7%)         | >0.999  |
| Age of onset, years                      | 15.4 (11.8) | 13.7 (10.3)    | 0.327   |
| Duration of epilepsy, years              | 23.0 (14.4) | 24.1 (13.9)    | 0.594   |
| Seizure frequency ( $\geq 1$ per month)* | 55 (98%)    | 109 (95%)      | 0.429   |
| Polytherapy ( $\geq 2$ AEDs)             | 53 (85%)    | 104 (85%)      | 0.868   |
| Number of AEDs (median; range)           | 2 (1-6)     | 2 (1-5)        | 0.894   |
| QT-prolonging drugs                      | 13 (21%)    | 26 (21%)       | 0.979   |
| Depolarization-blocking drugs            | 51 (82%)    | 94 (76%)       | 0.363   |
| Learning disability                      | 8 (13%)     | 22 (18%)       | 0.385   |
| Family history of epilepsy               | 5 (8%)      | 17 (14%)       | 0.254   |

Dichotomous data are expressed as n (%), and continuous data as mean (SD) unless indicated otherwise. P-values are calculated with the  $\chi^2$ - or the Fisher's exact test in dichotomous data, and with the Student's t- or Mann-Whitney U-test in continuous data. \*In 14 cases (8%) seizure frequency was unknown.
